# Supplementary material
Source: MDPI journal article supplement (https://www.mdpi.com/2071-1050/11/9/2650)
Supplement: s1 [file s1]

**Table S2:** Overview about which relationships were explored in the statistical analyses. Their selection was based on logical considerations and the focus of our research questions (note that we excluded the remaining six cultural services without significant results).

| Statistical analyses  |                                | Response variables          |                         |             |             |              |              |                     |                 |                |                 |                           |                            |                           |                       |                             |
|-----------------------|--------------------------------|-----------------------------|-------------------------|-------------|-------------|--------------|--------------|---------------------|-----------------|----------------|-----------------|---------------------------|----------------------------|---------------------------|-----------------------|-----------------------------|
|                       |                                |                             | Usage                   |             |             |              | CES          |                     | Rankings        |                |                 |                           | Ratings                    |                           |                       |                             |
|                       |                                | Fre-<br>quency<br>of visits | Enjoy-<br>ing<br>nature | Bik-<br>ing | Hik-<br>ing | Walk-<br>ing | Tour-<br>ism | Identifica-<br>tion | Recrea-<br>tion | Educa-<br>tion | Aes-<br>thetics | Diversi-<br>ty/Uniqueness | Affin-<br>ity to<br>nature | Biodiv.<br>know-<br>ledge | Bio-<br>div.<br>value | Plot<br>attrac-<br>tiveness |
| Explanatory variables | Plot                           |                             |                         | *           | *           |              | *            |                     |                 |                |                 |                           |                            |                           |                       | *                           |
|                       | Frequency of visits            |                             |                         |             |             |              |              |                     |                 |                |                 |                           |                            |                           |                       | *                           |
|                       | Gender                         |                             | *                       | *           |             |              |              |                     | *               |                | *               |                           | *                          |                           |                       | *                           |
|                       | Age                            | *                           | *                       |             | *           |              |              |                     |                 | *              |                 |                           | *                          | *                         |                       | *                           |
|                       | Connec-<br>tion to<br>land use |                             |                         | *           |             |              |              |                     |                 |                |                 | *                         |                            |                           |                       |                             |
|                       | Place of<br>residence          | *                           | *                       | *           | *           | *            |              | *                   |                 |                |                 |                           |                            |                           |                       |                             |
|                       | Affinity to<br>nature          |                             |                         |             |             |              |              |                     |                 |                |                 |                           |                            | *                         | *                     |                             |
|                       | Biodiv.<br>knowledge           |                             |                         |             |             |              |              |                     |                 | *              |                 |                           | *                          |                           | *                     |                             |
|                       | Biodiv.<br>value               |                             |                         |             |             |              |              |                     |                 |                |                 |                           | *                          | *                         |                       |                             |
|                       | Plot attrac-<br>tiveness       |                             |                         |             |             |              |              |                     |                 |                |                 |                           |                            |                           |                       |                             |

Analysed relationships

\* = significant results
