# Supplementary material
Source: MDPI journal article supplement (https://www.mdpi.com/2071-1050/11/9/2650)
Supplement: s1 [file s1]

**Questionnaire S1:** English translation of the questionnaire used to assess the cultural ecosystem services of agricultural landscapes in the Swabian Alb biosphere reserve.

**1. General questions about the stay in the area:**

**How often do you come to this area?**

- |                                               |                                                |
|-----------------------------------------------|------------------------------------------------|
| <input type="checkbox"/> Daily                | <input type="checkbox"/> Once a week           |
| <input type="checkbox"/> Several times a week | <input type="checkbox"/> Several times a month |
| <input type="checkbox"/> Less frequently      |                                                |

**For which reasons do you usually come to this area?**

- |                                                      |                                                                     |
|------------------------------------------------------|---------------------------------------------------------------------|
| <input type="checkbox"/> Cycling                     | <input type="checkbox"/> Jogging                                    |
| <input type="checkbox"/> Hiking                      | <input type="checkbox"/> Taking a walk                              |
| <input type="checkbox"/> Horseback riding            | <input type="checkbox"/> Enjoying nature                            |
| <input type="checkbox"/> Nordic Walking              | <input type="checkbox"/> Route to another location (e.g. workplace) |
| <input type="checkbox"/> Collecting wild plants etc. | <input type="checkbox"/> Walking the dog                            |
| <input type="checkbox"/> Family trips                | <input type="checkbox"/> Other:                                     |

**2. Cultural values:**

**In general, what is most important for you in a landscape? Please rank the following issues from 1 (most important) to 4 (least important).**

- |                                            |                                                                    |
|--------------------------------------------|--------------------------------------------------------------------|
| <input type="text"/> Recreational value    | <input type="text"/> Possibilities for (environmental) education   |
| <input type="text"/> Beauty and aesthetics | <input type="text"/> Cultural and natural diversity and uniqueness |

**Which cultural values are supported by the area?**

- |                                                        |                                                          |
|--------------------------------------------------------|----------------------------------------------------------|
| <input type="checkbox"/> Sports                        | <input type="checkbox"/> Leisure activities              |
| <input type="checkbox"/> Tourism                       | <input type="checkbox"/> Environmental education         |
| <input type="checkbox"/> Education                     | <input type="checkbox"/> Landscape aesthetics            |
| <input type="checkbox"/> Identification/Sense of place | <input type="checkbox"/> Cultural heritage and tradition |
| <input type="checkbox"/> Other:                        |                                                          |

**How high is your affinity to nature on a scale from 1 to 5?**

(1 = low; 5 = high)

- ☐ 1    ☐ 2    ☐ 3    ☐ 4    ☐ 5

### **3. Biological diversity:**

How high would you rate your general standard of knowledge about the topic biodiversity? (1 = low; ☐ 1    ☐ 2    ☐ 3    ☐ 4    ☐ 5  
5 = high)

Which value has the biodiversity of a landscape for you? ☐ 1    ☐ 2    ☐ 3    ☐ 4    ☐ 5  
(1 = low; 5 = high)

### **4. Assessment of appearance of the landscape and landscape structures:**

Which places do you find attractive, beautiful or interesting around here? Please mark a maximum of 5 places in the aerial photograph of the plot; these could be points, routes or areas.

How would you rate the attractiveness of this area? ☐ 1    ☐ 2    ☐ 3    ☐ 4    ☐ 5  
(1 = low; 5 = high)

Which (semi-)natural landscape structures (if present) do you find particularly appealing in this area?

- |                                        |                                                             |
|----------------------------------------|-------------------------------------------------------------|
| <input type="checkbox"/> Fields        | <input type="checkbox"/> Orchards                           |
| <input type="checkbox"/> Meadows       | <input type="checkbox"/> Pastures                           |
| <input type="checkbox"/> Hedges/Groves | <input type="checkbox"/> Diversity in landscape and species |
| <input type="checkbox"/> Other:        | <input type="checkbox"/> None                               |

Which artificial landscape structures (if present) do you find particularly appealing in this area?

- |                                                                |                                                  |
|----------------------------------------------------------------|--------------------------------------------------|
| <input type="checkbox"/> Benches                               | <input type="checkbox"/> Viewpoints              |
| <input type="checkbox"/> Information boards                    | <input type="checkbox"/> (Hiking) Parking places |
| <input type="checkbox"/> Buildings (farms, garden sheds, etc.) | <input type="checkbox"/> Other:                  |
| <input type="checkbox"/> None                                  |                                                  |

Could this landscape be improved to make it more attractive or interesting for visitors? If yes, how?

-----

Do you have additional comments about this landscape or its meaning for you?

-----

## **5. Personal details:**

All data will be treated as confidential and not passed on to unauthorised persons.

### **Gender**

☐ Male

☐ Female

### **Age**

☐ 16 - 20 years

☐ 21 - 30 years

☐ 31 - 40 years

☐ 41 - 50 years

☐ 51 - 60 years

☐ 61 - 70 years

☐ > 71 years

**Do you have a private or professional connection to the topic land use (e.g. having a kitchen garden, ownership/cultivation of orchards, forest, fields or the like)?**

-----

**Are you living in the vicinity of this area (< 10 km distance)?**

☐ Yes

☐ No
