# Supplementary material
Source: MDPI journal article supplement (https://www.mdpi.com/2071-1050/11/9/2650)
Supplement: s1 [file s1]

Archive with 4 entries (4 files):
- QuestionnaireS1.pdf
- TableS2_StatisticalAnalysis.pdf
- TableS3_QuestionnaireRawData.xlsx
- TableS4_MarkedPlacesOfInterest.xlsx
