# Supplementary material
Source: MDPI journal article supplement (https://www.mdpi.com/2071-1050/11/9/2650)
Supplement: s1 [file s1 › TableS3_QuestionnaireRawData.xlsx]

## Sheet: Questionnaire_R
Plot	Frequency	Reason_Biking	Reason_Jogging	Reason_Hiking	Reason_Walking	Reason_HorsebackRiding	Reason_EnjoyNature	Reason_FamilyTrip	Reason_RouteToOtherLocation	Reason_CollectingPlants	Reason_DogWalking	Reason_NordicWalking	Reason_Other	Company_Alone	Company_Friends	Company_Family	Company_Partner	Company_Other	Importance_Recreation2	Importance_Education2	Importance_Aesthetics2	Importance_DiversityUniqueness2	CES_Sport	CES_LeisureActivity	CES_Tourism	CES_EnvironmentalEducation	CES_Education	CES_Aesthetics	CES_Identity	CES_BasisOfExistence	CES_CulturalHeritage	CES_None	CES_Other	Rating_TouchWithNature	Rating_KnowledgeBiodiversity	Rating_ValueBiodiversity	Rating_Attractivity	NaturalStructures_Fields	NaturalStructures_Orchards	NaturalStructures_HedgesGroves	NaturalStructures_Pastures	NaturalStructures_Meadows	NaturalStructures_Diversity	NaturalStructures_None	OtherNaturalStructures_Relief	OtherNaturalStructures_SpecificElements	ArtificialStructures_Benches	ArtificialStructures_Viewpoints	ArtificialStructures_InfoBoards
AV1	Several times a week	1	1	0	0	0	0	0	0	0	0	0	0	0	1	0	0	0	1	2	3	3	1	0	0	0	0	0	0	0	1	0	0	5	3	4	5	0	1	0	0	1	1	0	0	0	0	0	0
AV1	Daily	0	0	1	1	0	1	0	0	0	0	0	0	0	1	1	0	0	2	3	1	4	0	1	0	1	0	1	0	1	0	0	0	4	3	4	4	0	1	0	0	1	0	0	0	0	0	0	0
AV1	Several times a week	1	0	0	1	0	1	0	0	0	0	0	1	1	0	0	1	0	3	4	1	2	1	1	0	0	0	1	1	0	1	0	0	5	4	5	5	1	1	1	0	1	1	0	0	0	0	0	0
AV1	Daily	0	1	0	1	1	1	0	0	0	0	0	0	0	1	0	0	0	2	4	3	1	1	1	0	0	0	1	1	0	0	0	0	4	2	3	4	1	1	0	0	0	1	0	0	0	1	0	0
AV1	Daily	0	0	0	0	0	0	0	0	0	1	0	0	1	0	0	0	0	2	4	1	3	0	1	0	0	0	1	0	0	0	0	0	3	1	3	2	0	0	0	0	0	0	1	0	0	1	0	0
AV1	Daily	0	0	0	1	0	1	0	1	0	0	0	0	1	0	0	0	0	1	2	3	4	1	1	0	0	0	1	1	0	1	0	0	4	2	5	4	1	1	0	1	1	0	0	0	0	0	0	0
AV1	Several times per month	0	0	0	0	0	0	0	0	0	0	0	1	1	0	1	1	0	1	3	2	4	0	1	0	0	0	0	1	0	0	0	0	5	2	4	5	0	1	0	0	1	1	0	0	0	0	0	0
AV1	Daily	0	0	0	1	0	1	0	0	0	1	0	0	1	1	0	0	0	1	1	1	1	0	1	0	0	0	1	0	0	1	0	0	5	3	5	4	0	1	0	1	0	0	0	0	0	0	0	0
AV1	Several times a week	0	0	0	1	0	1	0	0	0	1	0	0	1	0	1	1	0	2	4	1	3	1	1	0	0	0	1	0	0	0	0	0	4	2	4	2	0	1	0	0	0	1	0	0	0	0	0	0
AV1	Daily	0	0	1	0	0	1	0	0	0	1	0	0	1	0	0	0	0	1	2	1	1	0	1	0	0	0	1	0	0	0	0	0	3	1	3	4	0	0	0	0	0	1	0	0	0	1	0	1
AV1	Several times per month	1	0	0	1	0	0	0	0	0	0	0	0	0	0	0	1	0	1	3	2	3	0	1	1	0	0	0	0	0	1	0	0	4	3	4	3	1	1	0	0	0	0	0	0	0	0	0	0
AV1	Several times per month	1	0	1	1	0	1	0	0	0	0	0	0	0	0	1	1	0	1	4	2	3	1	1	1	0	0	1	1	0	0	0	0	4	3	3	3	0	1	0	0	0	1	0	0	0	0	1	1
AV1	Several times per month	0	0	0	1	0	0	0	0	0	0	0	0	1	0	0	0	0	2	4	3	1	0	1	0	0	0	0	1	0	1	0	0	4	2	4	5	0	1	0	1	0	0	0	0	0	0	0	0
AV1	Daily	1	0	1	1	0	1	1	0	1	0	1	0	1	1	1	1	0	2	4	3	1	1	1	0	1	1	1	1	0	1	0	0	5	3	5	5	0	1	0	0	1	0	0	1	0	1	0	0
AV1	Once a week	1	0	0	1	0	1	0	1	0	0	0	0	1	1	0	0	0	1	4	3	2	0	1	0	0	0	0	0	0	1	0	0	5	3	5	4	0	1	0	0	0	1	0	1	0	0	0	0
AV1	Daily	0	0	0	1	0	1	0	0	0	0	0	1	0	0	0	1	0	2	3	1	4	1	1	1	1	0	1	1	0	1	0	0	5	4	5	3	1	1	0	0	0	1	0	0	0	0	0	0
AV1	Once a week	1	0	0	1	0	1	0	1	0	0	1	0	1	1	1	0	0	1	3	1	2	1	1	0	0	0	1	1	0	0	0	0	3	1	4	3	0	1	0	0	1	0	0	0	0	0	0	0
AV1	Several times a week	0	0	0	1	0	0	0	0	0	0	0	0	1	0	0	0	0	4	3	2	1	0	1	0	1	0	1	0	0	0	0	0	5	3	5	4	0	1	0	0	1	0	0	0	0	0	0	1
AV1	Daily	0	0	0	0	0	0	0	0	0	1	0	0	1	0	0	0	0	1	3	2	3	1	0	0	0	0	0	1	0	0	0	0	5	3	2	5	0	1	0	0	1	0	0	0	0	0	0	0
AV1	Once a week	0	0	1	1	0	1	0	0	0	0	0	0	0	0	0	1	0	1	4	2	3	0	0	0	0	0	1	1	0	1	0	0	5	3	4	5	0	1	0	0	1	1	0	0	0	0	0	0
AV1	Once a week	0	1	0	1	0	1	0	1	0	0	0	0	1	1	0	1	0	1	3	2	3	1	1	0	0	0	1	1	0	1	0	0	5	2	5	4	0	1	0	0	0	1	0	0	1	0	0	1
AV1	Once a week	0	0	0	1	0	0	0	0	0	0	1	0	0	1	1	0	0	2	3	3	1	1	0	0	0	0	0	1	1	0	0	0	4	3	5	5	0	1	0	0	0	0	0	0	0	0	0	1
AV1	Several times a week	1	0	0	0	0	1	1	1	0	0	1	0	1	1	1	1	0	1	4	3	2	1	1	1	0	1	0	1	0	0	0	0	3	3	5	4	1	1	0	0	1	1	0	1	0	1	1	0
AV1	Once a week	1	0	0	0	0	1	1	0	0	0	1	0	0	1	1	0	0	1	4	2	3	1	1	0	0	0	0	1	1	1	0	0	4	2	5	2	1	1	0	1	0	0	0	0	0	0	0	0
AV1	Daily	0	0	0	0	0	1	0	0	0	1	0	0	0	1	0	1	0	1	4	3	2	1	1	0	1	1	0	0	0	1	0	0	4	3	5	4	0	1	0	1	1	1	0	0	0	1	1	1
AV1	Daily	0	0	0	0	0	0	0	1	0	0	0	1	1	0	0	1	0	1	1	1	1	1	0	0	0	0	0	1	1	0	0	0	5	4	4	4	1	1	0	0	1	0	0	0	0	0	0	0
AV1	Several times a week	1	0	0	1	0	1	0	0	0	0	0	0	0	1	0	1	0	1	1	1	1	1	1	1	0	0	1	0	0	0	0	0	5	4	4	4	0	0	0	0	0	1	0	0	0	1	1	0
AV1	Several times a week	1	0	0	1	0	1	0	0	0	0	0	0	1	1	0	1	0	1	4	2	3	1	0	1	0	0	0	1	0	0	0	0	4	3	4	3	0	0	0	0	0	1	0	0	0	0	1	0
AV1	Less frequent	0	0	1	0	0	1	0	0	0	0	0	0	0	0	0	1	0	1	2	1	2	0	1	1	0	0	0	0	1	0	0	0	5	4	4	5	0	0	0	0	0	1	0	0	0	0	0	0
AV1	Less frequent	0	0	1	0	0	1	0	0	0	0	0	0	0	0	0	1	0	2	3	1	4	0	1	1	1	0	0	0	0	1	0	0	4	3	3	4	0	1	1	0	0	0	0	0	0	0	1	1
AV2	Daily	0	0	0	0	0	1	0	0	1	1	1	0	1	0	1	0	0	1	3	2	2	1	0	1	0	0	1	1	1	1	0	0	5	2	2	5	0	0	0	0	1	1	0	0	0	1	0	1
AV2	Several times a week	0	0	0	0	0	0	0	0	0	0	1	0	1	0	0	1	0	1	2	1	1	1	0	1	0	0	0	0	1	0	0	0	5	2	5	5	1	1	1	1	1	1	0	0	0	1	0	1
AV2	Several times a week	0	0	0	0	0	0	0	0	0	1	0	0	1	1	0	0	0	2	1	2	1	1	1	1	0	0	0	0	1	1	0	0	3	3	4	5	0	0	0	0	0	1	0	0	0	1	0	0
AV2	Several times a week	0	0	1	1	0	1	0	0	0	0	1	0	1	1	0	1	0	1	4	3	2	1	1	1	0	0	0	1	0	1	0	0	4	2	4	3	0	1	0	0	0	1	0	1	0	1	0	0
AV2	Several times a week	0	0	0	0	0	0	0	0	0	1	0	0	0	1	0	0	0	3	2	1	4	0	1	0	0	0	0	0	0	0	0	0	2	1	2	2	1	0	0	0	1	0	0	0	0	0	0	0
AV2	Several times a week	0	0	0	0	0	0	0	1	0	1	0	0	1	1	1	1	0	1	4	2	3	0	1	0	0	0	0	0	0	0	0	0	4	2	5	4	0	0	0	1	1	0	0	0	0	0	0	0
AV2	Daily	1	0	0	1	0	0	0	0	0	1	0	0	1	0	0	1	0	1	3	4	2	1	1	0	0	0	0	0	0	0	0	0	4	3	4	5	1	0	0	0	1	1	0	0	0	1	0	0
AV2	Daily	0	0	0	1	0	1	0	0	0	1	0	0	1	0	0	0	0	1	4	2	3	1	1	0	0	0	0	0	1	0	0	0	5	3	4	4	0	1	0	0	0	1	0	0	0	0	0	0
AV2	Several times a week	0	0	0	1	1	0	0	0	0	1	0	0	1	1	1	0	0	1	3	2	4	1	0	0	0	0	0	0	0	0	0	0	3	2	4	3	0	0	0	0	1	1	0	0	0	0	0	0
AV2	Less frequent	0	0	0	1	0	1	0	0	0	0	0	0	0	0	0	1	0	2	4	3	1	0	0	1	0	0	1	1	0	1	0	0	3	1	4	4	0	1	0	0	1	1	0	0	0	1	0	0
AV2	Less frequent	0	0	0	1	0	1	0	0	0	1	0	0	1	0	0	0	0	1	4	3	2	0	0	0	0	0	1	1	0	1	0	0	4	3	4	4	0	0	0	0	0	1	0	0	0	0	0	0
AV2	Daily	0	0	0	1	0	0	0	0	0	1	0	0	1	1	1	0	0	2	4	3	1	0	1	1	0	0	1	1	0	1	0	0	5	3	5	5	0	1	0	0	1	1	0	0	0	0	0	0
AV2	Several times a week	0	0	0	0	0	0	0	0	0	1	0	0	1	0	0	0	0	2	3	4	1	0	1	1	0	0	0	0	0	0	0	0	4	3	4	3	0	0	0	0	1	1	0	0	0	0	0	0
AV2	Several times per month	1	0	0	0	0	0	0	0	0	0	1	0	0	1	1	0	0	1	1	1	2	1	1	1	1	0	0	0	0	0	0	0	5	3	3	5	0	1	0	0	1	0	0	1	0	1	0	1
AV2	Daily	0	0	0	0	0	0	0	0	0	1	0	1	1	0	1	0	0	4	2	3	1	1	0	1	1	0	1	1	1	1	0	0	5	5	5	5	0	1	1	0	1	1	0	0	0	0	0	0
AV2	Several times a week	0	0	0	0	0	0	0	1	0	1	0	0	1	0	1	1	0	1	3	2	4	1	0	1	0	0	0	1	0	1	0	0	4	3	4	2	0	1	0	1	1	0	0	0	0	1	0	0
AV2	Less frequent	0	0	1	0	0	0	0	0	0	1	0	0	1	0	0	0	0	1	3	1	2	0	1	0	0	0	0	1	0	1	0	0	5	2	5	4	1	1	0	0	1	1	0	0	0	0	0	0
AV2	Several times a week	0	0	0	0	0	1	0	0	0	0	1	0	1	0	0	1	0	1	2	3	4	1	1	0	1	1	1	1	0	1	0	1	5	3	5	5	0	0	0	0	1	1	0	0	0	1	0	0
AV2	Several times a week	0	0	0	1	0	1	0	1	0	0	0	0	1	0	0	0	0	2	4	1	3	1	1	0	1	0	1	0	1	1	0	0	5	2	4	4	1	1	0	0	1	0	0	1	0	0	0	0
AV2	Several times a week	0	0	0	0	0	0	0	0	0	1	0	0	1	0	0	1	0	1	4	2	3	1	1	0	0	0	1	1	0	0	0	0	5	3	5	4	0	1	0	0	0	1	0	1	0	0	0	0
AV2	Several times a week	1	0	0	1	0	1	0	0	0	0	1	0	1	0	0	1	0	3	4	1	2	1	1	0	0	0	1	1	0	1	0	0	4	3	4	5	0	0	0	0	0	1	0	0	0	1	0	1
AV2	Once a week	0	0	0	0	0	1	0	0	0	0	1	0	0	1	0	0	0	2	4	3	1	1	1	0	0	0	0	1	0	0	0	0	4	3	5	5	0	1	0	0	0	1	0	0	0	0	0	0
AV2	Several times per month	1	0	1	1	0	1	1	1	0	0	1	0	0	1	1	0	0	2	4	1	3	1	1	0	0	0	0	1	0	0	0	0	5	3	4	4	0	1	0	0	0	1	0	0	0	0	1	0
AV2	Several times a week	1	0	1	0	0	1	0	0	0	0	1	0	0	1	1	0	0	2	4	1	3	1	1	0	0	1	1	0	0	1	0	0	5	5	5	5	1	1	1	0	1	1	0	0	0	1	1	0
AV2	Daily	0	0	0	0	0	0	0	0	0	1	0	0	0	0	0	1	0	2	4	1	3	0	0	0	0	0	1	0	1	0	0	0	4	3	5	5	0	1	0	0	0	0	0	0	0	1	1	0
AV2	Daily	0	0	0	1	0	1	0	0	0	1	0	0	1	0	1	0	0	1	2	3	4	0	1	0	1	0	1	0	0	0	0	0	1	5	4	5	0	1	0	0	0	1	0	0	0	1	0	0
AV2	Daily	1	1	0	0	0	1	0	0	0	1	0	0	1	1	1	1	0	1	4	2	3	1	1	1	0	0	0	0	0	0	0	0	4	3	3	4	0	1	0	0	0	1	0	0	0	0	0	0
AV2	Several times per month	1	0	1	0	0	1	0	0	0	0	1	0	0	1	0	1	0	2	3	4	1	1	0	1	0	0	1	0	1	1	0	0	3	2	4	5	1	1	1	0	1	1	0	1	0	0	0	1
AV2	Several times a week	1	0	0	1	0	1	1	0	0	0	1	1	0	1	1	1	0	1	3	2	4	1	1	1	0	0	1	1	0	1	0	0	4	3	4	5	0	1	0	0	0	1	0	1	0	0	1	1
AV2	Daily	1	1	1	0	0	1	0	0	0	1	0	0	1	1	1	0	0	2	1	4	3	1	1	1	1	0	1	1	1	1	0	0	5	3	5	5	0	0	0	0	0	1	0	0	0	1	0	1
KA1	Less frequent	0	0	1	0	0	0	0	0	0	0	0	0	0	1	0	0	0	3	4	1	2	1	0	0	0	0	1	0	0	0	0	0	5	2	4	5	1	0	0	0	1	0	0	0	0	0	0	0
KA1	Less frequent	0	0	1	0	0	1	0	0	0	0	0	0	0	1	0	0	0	3	4	2	1	1	1	0	0	0	0	0	0	0	0	0	5	3	5	5	0	0	0	0	1	1	0	1	0	0	1	1
KA1	Less frequent	1	0	0	0	0	0	0	0	0	0	0	0	1	0	0	0	0	3	4	2	1	1	0	1	1	0	0	0	1	1	0	0	4	3	4	4	1	0	0	0	1	0	0	1	0	0	0	1
KA1	Less frequent	1	0	1	1	0	1	0	0	0	0	0	0	0	0	0	1	0	3	4	2	1	0	1	0	0	0	0	1	0	1	0	0	4	2	5	5	0	0	1	0	1	1	0	0	0	0	1	1
KA1	Less frequent	1	0	0	0	0	1	0	0	0	0	0	0	0	0	0	1	0	3	4	1	2	1	1	1	1	0	0	0	0	0	0	0	5	3	4	3	0	0	1	1	0	0	0	1	0	1	1	0
KA1	Less frequent	1	0	1	1	0	1	1	0	0	0	0	0	0	1	1	1	0	1	2	3	4	1	1	1	0	0	1	1	1	0	0	0	5	4	5	3	0	0	0	1	0	1	0	0	0	1	1	1
KA1	Less frequent	1	0	0	0	0	1	0	0	0	0	0	0	0	1	0	0	0	1	4	3	2	1	1	0	0	0	0	0	0	0	0	0	3	2	4	3	0	0	0	0	1	1	0	0	0	0	1	0
KA1	Several times per month	1	0	0	0	0	1	0	0	0	0	0	0	0	1	0	1	0	3	4	2	1	1	1	0	0	0	1	1	0	1	0	0	5	5	5	5	1	0	1	1	1	1	0	0	1	1	1	0
KA1	Several times per month	0	0	1	0	0	1	0	0	0	0	0	0	0	0	0	1	0	3	2	1	4	0	1	0	0	0	1	0	0	0	0	0	3	4	5	5	0	0	1	0	1	1	0	1	0	1	0	1
KA1	Less frequent	1	0	1	0	0	0	0	0	0	0	0	0	1	1	0	0	0	1	4	2	3	1	1	0	0	0	1	0	1	0	0	0	4	3	4	4	0	0	0	0	0	1	0	0	0	0	0	0
KA1	Less frequent	1	0	1	0	0	1	0	0	1	0	0	0	0	1	1	1	0	2	3	1	4	1	1	0	1	0	0	1	0	1	0	0	5	3	5	3	0	0	1	0	0	0	0	1	0	0	0	0
KA1	Daily	0	0	1	0	0	1	0	0	0	1	1	0	1	1	0	1	0	1	3	2	4	1	1	0	0	0	0	0	0	0	0	0	5	2	5	5	1	0	0	1	1	0	0	1	0	1	1	0
KA1	Daily	1	0	0	1	0	1	0	0	0	1	0	1	1	0	0	0	0	1	3	4	2	1	0	0	0	0	0	0	0	1	0	0	4	3	4	5	1	0	0	1	1	0	0	1	0	1	0	1
KA1	Less frequent	0	0	1	0	0	1	1	0	0	1	0	0	0	1	1	1	0	1	4	2	3	1	1	0	1	1	1	1	0	0	0	0	5	3	5	5	1	0	0	1	0	1	0	0	0	1	1	0
KA1	Less frequent	0	0	1	0	0	1	0	0	0	0	0	0	0	0	1	1	0	2	4	1	3	0	1	0	1	0	0	0	0	0	0	0	5	2	4	5	0	0	0	0	0	1	0	1	0	0	0	0
KA1	Less frequent	0	0	1	0	0	0	0	0	0	0	0	0	1	1	0	0	0	1	3	2	3	0	0	0	0	0	1	0	0	0	0	0	5	3	4	3	1	0	0	0	1	0	0	0	0	0	1	0
KA1	Less frequent	0	0	1	1	0	1	0	0	0	0	0	0	1	1	0	1	0	2	4	1	3	1	0	1	0	0	0	0	0	1	0	0	5	3	4	4	0	0	0	1	1	1	0	0	0	1	1	1
KA1	Less frequent	1	0	1	1	0	1	1	0	0	0	0	0	0	1	0	1	0	1	4	2	3	1	1	0	1	0	1	0	0	0	0	0	5	4	5	4	1	0	1	0	1	1	0	0	0	0	1	1
KA1	Less frequent	1	0	1	0	0	1	0	0	0	0	0	0	0	1	0	0	0	3	4	2	1	0	0	0	0	0	1	1	1	0	0	0	4	2	5	4	0	0	1	0	0	1	0	1	1	0	0	0
KA1	Less frequent	1	0	1	0	0	1	0	0	0	0	0	1	1	0	0	1	0	1	4	2	3	1	1	0	0	0	1	0	0	0	0	0	5	2	5	5	0	0	1	0	0	1	0	0	0	1	1	1
KA1	Less frequent	1	0	1	0	0	1	0	0	0	0	0	1	1	0	0	1	0	1	4	2	3	1	1	0	1	0	1	0	0	0	0	0	5	5	5	4	0	0	1	0	0	1	0	0	0	1	1	1
KA1	Once a week	0	0	1	0	0	1	0	0	0	0	0	0	0	1	0	0	0	1	4	2	3	0	1	0	0	0	1	1	0	0	0	0	5	4	5	5	0	0	0	0	1	1	0	1	0	1	1	0
KA1	Once a week	0	0	1	0	0	1	0	0	0	0	0	0	0	1	0	0	0	1	4	2	3	0	1	0	0	0	1	0	0	0	0	0	5	3	5	5	0	0	1	0	1	1	0	1	0	1	1	0
KA1	Once a week	0	0	1	0	0	0	0	0	0	0	0	0	1	0	0	0	0	1	3	2	3	0	1	1	1	0	0	0	1	0	0	0	5	3	5	4	0	0	1	0	0	1	0	0	0	0	1	0
KA1	Daily	1	0	0	0	0	0	0	0	0	1	0	0	1	0	0	0	0	1	4	3	2	1	1	0	0	0	0	0	0	0	0	0	4	3	4	3	1	0	0	0	1	0	0	0	0	1	1	0
KA1	Less frequent	1	0	0	0	0	1	0	0	0	0	0	0	0	0	0	1	0	1	3	2	4	0	1	1	0	0	0	0	0	0	0	0	4	2	5	5	0	0	1	1	1	0	0	0	0	1	1	0
KA1	Several times per month	1	0	0	0	0	0	0	0	0	0	0	0	1	1	0	0	0	1	3	2	4	1	0	1	0	0	0	0	0	0	0	0	5	3	4	4	0	0	1	1	1	0	0	0	0	0	1	0
KA1	Once a week	1	0	0	0	0	1	0	0	0	0	0	0	1	1	0	0	0	1	3	3	2	1	1	1	0	0	0	1	1	0	0	0	5	4	4	4	1	0	1	1	1	0	0	0	0	1	1	1
KA1	Several times per month	0	0	1	0	0	1	0	0	0	0	0	1	0	0	0	1	0	1	1	1	1	1	1	1	0	0	1	0	0	1	0	0	5	3	5	4	0	0	0	0	0	1	0	1	0	1	1	0
KA1	Several times per month	1	0	1	0	0	1	0	0	0	0	0	1	0	1	0	1	0	2	3	3	1	0	0	0	0	0	1	1	1	1	0	0	5	4	5	4	0	0	0	1	1	1	0	0	0	0	0	0
KA2	Several times a week	0	0	0	1	1	0	0	0	0	1	0	0	1	0	1	0	0	1	3	2	3	0	1	0	0	0	0	1	0	0	0	0	4	2	2	5	0	0	0	0	0	1	0	0	0	0	1	1
KA2	Less frequent	1	0	1	0	0	1	0	0	0	0	0	0	1	1	0	0	0	1	4	2	3	1	1	0	1	0	1	1	0	0	0	0	5	1	5	4	1	0	0	0	1	1	0	0	0	1	0	1
KA2	Less frequent	0	0	0	1	0	1	0	0	0	0	0	0	0	0	0	1	0	3	4	2	1	0	1	1	0	0	1	0	0	1	0	0	4	3	5	5	0	0	0	0	0	1	0	0	0	0	1	0
KA2	Less frequent	0	0	0	1	0	1	0	0	0	0	0	0	0	1	0	0	0	2	4	3	1	0	1	0	0	0	0	0	0	1	0	0	4	3	5	4	0	0	0	1	1	0	0	0	0	0	1	1
KA2	Less frequent	0	0	1	0	0	0	0	0	0	0	0	0	0	0	1	0	0	4	3	1	2	0	1	1	1	0	1	1	0	1	0	0	5	3	5	4	0	0	0	0	0	1	0	0	0	0	1	1
KA2	Less frequent	0	0	1	0	0	1	0	0	0	0	0	0	0	1	0	0	0	2	2	2	1	0	0	0	1	0	1	0	0	0	0	0	5	5	5	4	0	1	1	0	0	1	0	0	0	0	0	0
KA2	Less frequent	0	0	1	0	0	1	0	0	0	0	0	0	0	0	0	1	0	1	4	3	2	0	0	1	1	0	1	0	0	0	0	0	5	5	5	5	0	0	1	0	1	1	0	0	0	0	1	0
KA2	Less frequent	0	0	1	0	0	0	0	0	0	0	0	0	1	1	0	1	0	4	3	2	1	0	0	0	0	1	0	1	0	0	0	0	4	4	5	5	0	0	0	0	0	1	0	1	0	1	1	0
KA2	Less frequent	0	0	1	0	0	0	0	0	0	0	0	0	1	0	0	1	0	3	4	2	1	0	1	1	0	0	0	0	0	0	0	0	3	1	5	4	1	0	0	1	1	0	0	0	0	0	1	1
KA2	Less frequent	0	0	1	0	0	0	0	0	0	0	0	0	1	1	0	1	0	1	4	3	2	1	1	1	1	0	1	1	0	1	0	0	3	1	4	5	0	1	1	0	1	1	0	0	0	1	1	0
KA2	Several times per month	0	0	1	0	0	1	0	0	0	0	0	0	0	0	0	1	0	1	4	2	3	1	1	1	0	0	0	0	0	0	0	0	4	3	5	4	0	0	0	0	0	1	0	0	0	1	0	1
KA2	Several times per month	1	0	1	0	0	1	0	0	0	0	0	0	0	1	0	1	0	1	1	1	1	0	1	0	0	0	0	0	0	0	0	0	4	3	4	4	0	0	0	1	0	0	0	0	0	0	0	0
KA2	Less frequent	0	0	1	0	0	1	1	0	0	0	0	0	0	1	1	1	0	3	4	1	2	1	1	1	1	0	1	1	0	1	0	0	5	5	5	5	0	0	1	1	1	0	0	0	0	1	1	0
KA2	Less frequent	0	1	1	1	0	1	0	0	0	0	0	0	1	0	0	0	0	1	2	3	4	1	1	1	1	0	0	1	1	0	0	0	5	3	4	4	0	0	0	1	1	1	0	0	0	1	1	1
KA2	Daily	1	0	1	1	0	1	0	0	0	1	1	0	1	0	1	1	0	1	4	3	2	1	0	1	1	0	1	1	0	1	0	0	5	2	5	5	0	0	0	0	0	1	0	0	0	0	0	1
KA2	Daily	1	0	0	1	0	1	1	0	0	1	1	0	1	0	1	1	0	1	2	3	4	0	0	1	0	0	0	0	0	0	0	0	5	4	5	5	0	0	0	0	0	1	0	0	0	0	1	0
KA2	Several times per month	0	0	0	1	0	1	0	0	0	0	0	0	1	0	0	1	0	2	3	1	3	0	0	1	1	0	1	1	0	1	0	0	4	2	4	5	0	0	0	0	0	1	0	1	0	1	1	1
KA2	Less frequent	0	0	1	0	0	1	0	0	0	0	0	0	0	0	0	1	0	1	3	4	2	1	1	1	1	1	1	1	0	1	0	0	5	1	4	5	0	0	0	0	0	1	0	0	0	1	0	0
KA2	Less frequent	0	0	1	0	0	1	0	0	0	0	0	0	0	0	0	1	0	1	3	2	4	0	0	1	1	0	1	1	0	1	0	0	4	3	3	4	0	0	0	0	0	1	0	0	0	0	0	0
KA2	Daily	0	0	1	1	0	1	0	1	0	1	0	0	1	0	0	1	0	2	3	4	1	1	1	1	0	0	0	1	0	0	0	0	5	3	5	5	0	0	0	1	0	1	0	0	0	0	1	0
KA2	Several times a week	1	0	1	1	0	1	0	0	0	0	1	1	1	0	1	0	0	2	3	1	4	1	0	1	0	0	0	0	0	0	0	0	5	2	4	5	0	0	0	0	0	1	0	0	0	0	1	0
KA2	Several times per month	1	0	1	0	0	1	0	0	0	0	0	0	1	1	0	0	0	1	4	2	3	1	1	0	0	0	1	0	0	0	0	0	3	2	5	4	0	0	1	0	0	1	0	0	0	0	0	0
KA2	Less frequent	0	0	1	0	0	1	0	0	0	0	0	0	1	1	0	0	0	1	4	2	3	0	1	1	0	0	0	0	1	0	0	0	4	3	5	4	0	1	0	0	1	0	0	0	0	0	1	1
KA2	Several times a week	0	0	1	0	0	0	0	0	0	0	0	0	0	0	0	1	0	2	3	1	3	0	0	1	0	0	1	0	0	0	0	0	5	4	5	4	1	0	1	1	1	1	0	0	0	0	0	0
KA2	Less frequent	0	0	1	1	0	1	0	0	0	0	0	0	0	1	0	1	0	1	4	3	2	1	1	1	0	0	1	0	0	0	0	0	5	3	5	5	1	0	1	0	1	1	0	0	0	1	1	0
KA2	Less frequent	0	0	1	1	0	1	0	0	0	0	0	0	0	0	0	1	0	2	4	1	3	0	0	1	0	0	1	1	1	0	0	0	5	3	5	5	0	1	0	1	0	0	0	0	0	1	1	1
KA2	Several times per month	0	0	1	0	0	0	0	0	0	0	0	0	0	0	0	1	0	1	4	2	3	1	1	0	0	0	1	1	0	1	0	0	5	3	5	4	0	0	1	0	0	1	0	0	0	0	1	1
KA2	Less frequent	0	0	1	0	0	1	0	0	0	0	0	0	0	1	0	0	0	2	4	1	3	0	1	0	1	0	0	0	0	0	0	0	4	2	5	1	0	1	1	0	0	0	0	0	0	0	0	0
KA2	Less frequent	0	0	1	0	0	0	1	0	0	0	0	0	0	1	1	0	0	4	3	2	1	0	0	1	1	0	1	0	0	0	0	0	4	2	5	4	0	1	0	0	0	1	0	0	0	0	1	1
KA2	Less frequent	0	0	1	0	0	1	0	0	0	0	0	0	0	1	0	0	0	2	4	3	1	0	1	0	0	0	1	1	0	0	0	0	3	4	5	3	0	1	1	0	1	1	0	0	0	0	1	0
FA1	Several times a week	1	0	0	1	0	0	0	0	0	0	0	0	1	0	0	1	0	3	4	2	1	1	0	0	0	0	0	0	1	0	0	0	5	2	5	2	0	0	1	0	1	0	0	0	1	1	0	0
FA1	Less frequent	1	0	0	0	0	1	0	0	0	0	0	0	0	0	0	1	0	1	3	4	2	0	1	0	0	0	0	0	1	0	0	0	4	2	4	4	0	0	0	0	0	1	0	0	0	0	0	0
FA1	Less frequent	1	0	0	0	0	1	1	0	0	0	0	0	0	0	1	1	0	1	4	2	3	0	0	1	0	0	1	1	1	1	0	0	4	2	4	4	1	0	1	0	1	1	0	0	1	0	1	1
FA1	Less frequent	1	0	0	0	0	1	0	0	0	0	0	0	1	0	0	0	0	2	4	1	3	1	0	0	0	0	0	0	0	0	0	0	5	3	5	2	0	0	0	0	0	0	0	0	1	0	0	0
FA1	Several times a week	1	0	0	0	0	1	0	0	0	0	0	0	1	1	0	0	0	2	4	3	1	0	1	1	0	0	0	1	0	1	0	0	5	2	3	3	1	0	1	0	0	0	0	0	0	0	0	0
FA1	Several times a week	1	0	0	0	0	1	0	0	0	0	0	0	1	1	1	0	0	1	2	1	3	1	1	1	0	1	0	1	0	1	0	0	5	2	3	4	1	0	1	0	1	1	0	0	0	1	0	0
FA1	Less frequent	1	0	0	0	0	1	0	0	0	0	0	0	0	0	0	1	0	1	4	3	2	0	1	0	0	0	0	0	1	0	0	0	3	3	4	3	1	0	0	0	0	0	0	0	0	0	0	0
FA1	Less frequent	1	0	0	0	0	1	0	0	0	0	0	0	0	0	0	1	0	3	4	2	1	1	1	1	0	0	1	1	1	1	0	0	5	3	5	4	1	0	1	0	1	1	0	1	0	0	1	0
FA1	Several times a week	1	0	0	1	0	0	0	0	0	0	1	0	1	0	1	0	0	3	2	4	1	0	0	0	1	1	0	1	1	0	0	0	4	3	5	4	0	0	1	0	0	1	0	0	0	1	1	1
FA1	Several times per month	1	0	0	0	0	0	0	0	0	0	0	0	0	0	0	1	0	2	4	1	3	1	1	1	0	0	1	0	0	0	0	0	3	2	5	5	1	0	1	0	1	1	0	0	0	1	1	0
FA1	Several times per month	1	0	0	0	0	1	0	0	0	0	0	0	0	0	0	1	0	2	4	1	3	1	0	0	0	0	1	0	1	0	0	0	4	3	3	3	0	0	1	0	0	0	0	0	0	0	0	0
FA1	Less frequent	0	0	1	1	0	1	0	0	0	0	0	0	0	0	0	1	0	1	3	2	3	1	1	0	0	0	0	0	0	0	0	0	4	2	4	4	0	0	0	0	0	1	0	0	0	0	0	1
FA1	Less frequent	0	0	1	0	0	1	0	0	0	0	0	0	0	0	0	1	0	3	4	2	1	1	0	1	1	0	1	1	0	0	0	0	5	3	5	4	1	0	0	0	1	1	0	0	0	0	0	0
FA1	Several times per month	1	0	0	0	0	1	0	0	0	0	0	0	0	1	0	0	0	3	3	1	3	1	1	0	0	0	1	1	1	0	0	0	4	3	4	4	1	0	1	0	0	1	0	0	0	0	0	0
FA1	Less frequent	1	0	0	0	0	1	0	0	0	0	0	0	0	1	0	0	0	2	4	3	1	0	1	1	0	0	0	0	1	1	0	0	4	3	5	2	0	0	1	0	0	0	0	0	0	0	0	0
FA1	Daily	1	0	0	1	0	1	0	0	0	0	1	0	0	1	1	1	0	1	1	1	1	1	0	1	0	0	1	1	1	1	0	0	5	4	4	5	1	0	1	1	1	1	0	0	1	1	1	1
FA1	Several times per month	1	0	0	0	0	0	0	1	0	0	0	0	1	0	1	0	0	4	2	3	1	0	1	1	0	0	0	0	1	0	0	0	5	4	5	3	0	0	1	0	0	0	0	0	0	0	0	1
FA1	Less frequent	1	0	0	0	0	1	0	0	0	0	0	0	1	1	0	0	0	1	4	2	3	1	1	0	0	0	0	0	1	0	0	0	4	3	5	2	0	0	0	0	1	1	0	0	0	0	0	0
FA1	Less frequent	1	0	0	0	0	1	0	0	0	0	0	0	0	0	0	1	0	3	4	2	1	1	0	1	0	0	0	0	1	1	0	0	5	4	4	4	1	0	0	0	0	0	0	1	0	0	0	0
FA1	Less frequent	1	0	0	0	0	1	0	0	0	0	0	0	0	0	0	1	0	3	4	1	2	0	1	0	0	0	0	0	1	0	0	0	5	3	4	2	1	0	0	0	0	0	0	0	0	0	0	0
FA1	Less frequent	1	0	0	0	0	0	0	0	0	0	0	0	0	1	0	0	0	1	1	1	1	1	0	1	1	0	0	0	1	1	0	0	4	2	5	4	1	0	1	0	1	1	0	0	0	0	0	1
FA1	Less frequent	1	0	1	0	0	1	0	0	0	0	0	0	1	1	1	1	0	1	1	1	1	0	1	0	0	0	0	1	1	0	0	0	4	4	5	2	1	0	1	0	1	0	0	0	0	1	1	0
FA1	Less frequent	1	0	0	0	0	1	0	0	0	0	0	0	0	0	0	1	0	1	4	3	2	1	0	0	0	0	0	1	1	0	0	0	3	2	3	4	1	0	0	0	0	0	0	1	0	0	0	1
FA1	Less frequent	1	0	0	0	0	1	0	0	0	0	0	0	0	0	0	1	0	1	4	2	3	1	1	0	1	0	1	1	0	1	0	0	5	3	5	4	1	0	1	0	1	1	0	1	0	0	0	0
FA1	Less frequent	1	0	0	0	0	0	0	0	0	0	0	0	0	0	0	1	0	2	4	3	1	0	1	1	0	0	0	1	0	1	0	0	4	3	4	4	1	0	1	0	0	0	0	0	0	0	0	1
FA1	Less frequent	1	0	0	0	0	1	0	0	0	0	0	0	0	0	0	1	0	2	4	1	3	1	0	1	0	0	1	0	0	1	0	0	4	4	5	3	0	0	1	0	0	1	0	0	0	0	0	1
FA1	Less frequent	0	0	1	0	0	1	0	0	0	0	0	0	0	0	0	1	0	1	4	3	2	1	1	0	0	0	1	1	0	1	0	0	4	1	4	4	1	0	1	0	0	0	0	1	0	0	0	1
FA1	Less frequent	0	0	1	1	0	1	0	0	0	0	0	0	0	0	0	1	0	2	4	1	3	1	1	1	0	0	0	0	0	1	0	0	5	2	4	3	0	0	1	0	0	0	0	1	0	0	0	1
FA1	Less frequent	1	0	1	1	0	1	1	0	0	0	0	0	0	1	1	0	0	3	2	1	4	1	1	1	1	0	0	1	0	1	0	0	5	4	5	3	0	0	1	0	1	1	0	0	1	0	0	0
FA1	Less frequent	1	0	0	0	0	1	1	0	0	0	0	0	0	0	1	1	0	1	4	3	2	1	1	1	0	0	0	0	1	0	0	0	4	4	5	3	0	0	1	0	0	1	0	0	1	0	0	0
FA2	Daily	1	0	1	1	1	1	0	1	0	0	0	0	1	0	1	1	0	2	3	4	1	0	1	1	1	0	0	1	1	0	0	0	5	4	5	4	0	0	1	1	1	0	0	0	0	1	1	1
FA2	Daily	0	0	0	1	0	1	0	0	0	0	0	1	1	0	1	0	0	2	3	1	4	0	1	0	0	0	0	1	1	0	0	0	4	3	5	3	1	0	1	1	1	1	0	0	0	1	0	1
FA2	Daily	0	0	0	1	1	1	0	1	0	0	0	0	1	0	1	0	0	1	4	3	2	1	1	1	1	0	0	0	0	1	0	0	5	3	5	3	0	0	1	0	1	1	0	0	0	0	1	1
FA2	Several times a week	1	1	0	1	0	1	0	0	0	0	0	0	1	0	1	1	0	1	3	2	4	1	1	0	0	0	0	1	0	1	0	0	5	1	4	5	1	0	0	0	1	0	0	0	0	1	1	1
FA2	Several times a week	0	0	0	0	1	1	0	1	0	0	0	0	1	0	0	0	0	3	4	2	1	0	0	1	0	0	1	1	0	0	0	0	5	3	4	3	0	0	0	1	0	1	0	0	0	0	1	0
FA2	Daily	0	0	0	0	1	0	0	0	0	0	0	0	0	1	0	0	0	2	3	1	4	1	1	0	1	0	0	0	0	0	0	0	4	2	5	4	1	0	0	1	1	0	0	0	0	0	1	0
FA2	Once a week	0	0	0	0	1	0	0	0	0	0	0	0	0	1	0	0	0	1	4	2	3	0	0	0	0	0	1	0	0	0	0	0	3	3	4	2	0	0	0	1	1	0	0	0	0	0	1	0
FA2	Less frequent	0	0	1	0	0	1	0	0	0	0	0	0	1	0	0	0	0	1	4	2	3	0	1	0	0	0	0	1	0	1	0	0	5	2	5	5	0	0	0	0	0	1	0	0	0	0	1	1
FA2	Less frequent	0	0	1	0	0	1	0	0	0	0	0	0	0	1	1	1	0	2	3	4	1	0	1	1	0	0	0	0	0	0	0	0	5	3	3	4	0	0	0	1	0	1	0	0	0	0	0	1
FA2	Less frequent	0	0	1	0	0	1	0	0	0	0	0	0	0	1	0	0	0	1	4	3	2	0	1	1	0	0	0	0	0	1	0	0	5	2	3	3	1	0	0	0	1	1	0	0	0	1	1	1
FA2	Less frequent	0	0	1	0	0	1	0	0	0	0	0	0	0	1	0	0	0	1	4	2	3	1	1	1	0	0	0	0	0	1	0	0	2	3	3	3	0	0	0	1	0	1	0	0	0	1	1	0
FA2	Several times a week	1	1	1	1	0	0	0	0	0	0	0	0	1	0	0	0	0	3	4	2	1	1	0	1	0	0	0	1	0	0	0	0	1	1	3	5	1	0	1	0	1	0	0	0	0	0	1	0
FA2	Daily	0	0	0	1	0	1	0	0	0	1	0	0	1	0	0	1	0	2	3	1	3	1	1	1	0	0	1	0	0	0	0	0	4	3	4	4	0	0	0	0	1	1	0	0	0	0	1	0
FA2	Daily	0	0	0	1	0	1	0	0	1	1	0	0	1	0	0	1	0	1	4	3	2	0	1	1	0	0	0	1	0	0	0	0	5	2	5	4	0	0	0	0	1	1	0	0	0	1	1	1
FA2	Daily	0	0	0	0	1	0	0	0	0	0	0	0	1	0	0	0	1	1	4	3	2	1	1	0	0	0	0	0	0	0	0	0	4	3	4	3	0	0	0	0	0	0	1	0	0	0	1	1
FA2	Several times a week	1	0	0	1	0	1	0	0	0	0	0	0	1	0	1	0	0	1	1	1	1	1	1	1	1	1	1	1	1	1	0	0	5	3	5	5	0	0	0	0	0	1	0	0	0	0	0	0
FA2	Once a week	0	0	0	0	1	0	0	0	0	0	0	0	0	0	1	0	0	1	2	1	2	0	1	0	0	0	0	0	0	0	0	0	5	1	3	3	1	0	0	0	1	0	0	0	0	0	0	0
FA2	Several times a week	0	0	0	1	1	0	0	0	0	1	0	0	1	0	1	0	0	1	3	2	4	1	1	1	0	0	0	0	0	0	0	0	5	3	4	3	0	0	1	0	0	1	0	0	0	0	1	1
FA2	Several times per month	0	0	0	0	1	1	0	0	0	0	0	0	0	0	1	0	0	1	3	2	4	1	1	0	1	0	0	0	0	0	0	0	4	2	5	5	0	0	0	1	1	0	0	0	0	1	0	0
FA2	Less frequent	1	0	1	0	0	1	0	0	0	0	0	0	0	1	0	1	0	1	4	2	3	1	1	0	0	0	0	0	0	0	0	0	5	3	4	2	0	0	1	0	1	0	0	0	0	0	0	0
FA2	Less frequent	1	0	0	0	0	1	0	0	0	0	0	0	1	0	0	1	0	3	3	2	1	0	1	1	1	0	1	0	0	0	0	0	4	3	4	2	1	0	1	1	1	0	0	0	0	0	0	0
FA2	Several times per month	1	0	0	0	0	1	0	0	1	0	0	0	1	0	0	1	0	1	4	2	3	1	1	1	0	0	0	1	0	0	0	0	4	3	3	5	0	0	1	0	0	1	0	0	0	0	1	0
FA2	Once a week	1	0	0	0	0	0	0	0	0	0	0	0	1	0	0	0	0	1	4	2	3	1	1	0	0	0	0	0	0	0	0	0	4	3	4	2	0	0	1	1	0	0	0	0	0	1	1	0
FA2	Daily	1	1	0	1	0	0	0	0	0	0	0	0	1	1	0	0	0	4	3	2	1	1	0	0	0	0	1	1	0	1	0	0	5	2	5	4	0	0	1	0	1	1	0	0	0	0	0	0
FA2	Less frequent	1	0	0	0	0	1	0	0	0	0	0	0	0	0	0	1	0	1	3	3	2	1	1	1	0	0	0	1	0	1	0	0	5	4	5	4	1	0	0	0	1	1	0	0	0	0	0	1
FA2	Less frequent	1	0	0	0	0	1	0	0	0	0	0	0	0	0	0	1	0	2	4	1	3	0	1	0	0	0	1	0	0	0	0	0	5	3	3	4	1	0	1	1	1	0	0	1	0	1	0	1
FA2	Several times per month	1	0	0	0	0	1	0	0	0	0	0	0	1	0	0	1	0	2	4	3	1	1	0	0	0	0	1	0	0	1	0	0	3	2	3	3	1	0	0	0	0	1	0	0	0	0	1	1
FA2	Several times a week	0	0	0	1	0	1	0	0	0	0	0	0	1	0	0	0	0	2	3	1	3	1	0	1	0	0	0	1	0	0	0	0	4	3	3	4	0	0	0	0	0	1	0	0	0	1	1	1
FA2	Daily	1	1	1	1	1	1	1	1	0	0	0	0	1	0	1	0	0	2	3	4	1	0	0	1	0	1	0	0	0	1	0	0	5	3	5	4	0	1	1	1	0	0	0	0	0	1	1	1
FA2	Daily	1	0	1	1	0	1	1	1	0	0	0	0	0	1	1	1	0	1	2	1	1	1	1	1	1	1	1	1	1	1	0	0	4	2	5	4	0	0	0	0	0	0	0	1	0	1	1	1
[truncated: 27 more columns]
