# Supplementary material
Source: MDPI journal article supplement (https://www.mdpi.com/2071-1050/11/9/2650)
Supplement: s1 [file s1 › TableS4_MarkedPlacesOfInterest.xlsx]

## Sheet: All_Points
Object ID	Feature	Reason	Plot	CES_Identity	CES_Heritage	CES_Aesthetics	CES_Recreation	Natural_Feature
1	Line	Favorite path	FA1	0	0	0	1	0
2	Line	Favorite path (partly through forest)	FA1	0	0	0	1	0
3	Area	Forest	FA1	0	0	1	0	1
4	Area	Flower strip	FA1	0	0	1	0	0
5	Area	Diverse cropland	FA1	0	1	0	0	0
6	Area	Forest	FA1	0	0	1	0	1
7	Area	Grove	FA1	0	0	1	0	1
8	Area	Forest	FA1	0	0	1	0	1
9	Area	Grainfield	FA1	0	1	0	0	0
10	Area	Forest	FA1	0	0	1	0	1
11	Area	Forest	FA1	0	0	1	0	1
12	Area	Forest	FA1	0	0	1	0	1
13	Area	Groves/Hedges	FA1	0	0	1	0	1
14	Area	Groves/Hedges	FA1	0	0	1	0	1
15	Area	Groves/Hedges	FA1	0	0	1	0	1
16	Area	Groves/Hedges	FA1	0	0	1	0	1
17	Area	Groves/Hedges	FA1	0	0	1	0	1
18	Point	Viewpoint with bench	FA1	0	0	1	1	0
19	Point	Flower strip	FA1	0	0	1	0	0
20	Point	Flower strip	FA1	0	0	1	0	0
21	Point	Flower strip	FA1	0	0	1	0	0
22	Point	Flower strip	FA1	0	0	1	0	0
23	Area	Buildings	KA1	1	0	0	0	0
24	Area	Nutrient-poor grassland	KA1	0	1	0	0	1
25	Area	Hillside of volcano	KA1	0	0	1	0	1
26	Area	Hillside of volcano	KA1	0	0	1	0	1
27	Area	Pond	KA1	0	0	1	0	1
28	Area	Football grounds	KA1	0	0	0	1	0
29	Area	Nutrient-poor grassland	KA1	0	1	0	0	1
30	Area	Diversity, groves	KA1	0	0	1	0	1
31	Area	Pastures, nutrient-poor grassland	KA1	0	1	0	0	1
32	Point	View	KA1	0	0	1	0	0
33	Point	View	KA1	0	0	1	0	0
34	Point	Hill	KA1	0	0	1	0	1
35	Point	Bench, view	KA1	0	0	1	1	0
36	Point	View	KA1	0	0	1	0	0
37	Point	View	KA1	0	0	1	0	0
38	Point	Bench, view	KA1	0	0	1	1	0
39	Point	Pond	KA1	0	0	1	0	1
40	Point	Football ground	KA1	0	0	0	1	0
41	Point	View	KA1	0	0	1	0	0
42	Point	View	KA1	0	0	1	0	0
43	Point	Sheepfold	KA1	1	0	0	0	0
44	Point	Bench in shade	KA1	0	0	1	1	0
45	Line	Hiking route 1	FA2	0	0	0	1	0
46	Line	Hiking route 2	FA2	0	0	0	1	0
47	Line	Hiking route 3	FA2	0	0	0	1	0
48	Line	Favorite path	FA2	0	0	0	1	0
49	Line	Riding trail	FA2	0	0	0	1	0
50	Line	Path to nature conservation area	FA2	0	0	0	1	0
51	Line	Favorite path	FA2	0	0	0	1	0
52	Line	Path to the forest	FA2	0	0	0	1	0
53	Line	Favorite path	FA2	0	0	0	1	0
54	Line	Circular route	FA2	0	0	0	1	0
55	Line	Favorite path	FA2	0	0	0	1	0
56	Line	Jogging route, view	FA2	0	0	0	1	0
57	Line	Riding trail	FA2	0	0	0	1	0
58	Line	Favorite path 1	FA2	0	0	0	1	0
59	Line	Favorite path 2	FA2	0	0	0	1	0
60	Area	Forest edge	FA2	0	0	1	0	1
61	Area	Nature conservation area	FA2	0	0	1	0	1
62	Area	Own horse pasture	FA2	1	0	0	1	0
63	Area	Nature conservation area, nutrient-poor grassland	FA2	0	1	1	0	1
64	Area	Forest edge	FA2	0	0	1	0	1
65	Area	Nature conservation area	FA2	0	0	1	0	1
66	Area	Forest	FA2	0	0	1	0	1
67	Area	Groves	FA2	0	0	1	0	1
68	Area	Nature conservation area	FA2	0	0	1	0	1
69	Area	Nature conservation area	FA2	0	0	1	0	1
70	Area	Forest edge	FA2	0	0	1	0	1
71	Area	Nature conservation area	FA2	0	0	1	0	1
72	Area	Groves/Hedges	FA2	0	0	1	0	1
73	Area	Orchards	FA2	1	1	0	0	0
74	Area	Nature Conservation area	FA2	0	0	1	0	1
75	Area	Nature conservation area and biotopes at soil disposal site	FA2	0	0	1	0	1
76	Area	Grove (biotope)	FA2	0	0	1	0	1
77	Point	Schneckenhaeule	FA2	0	0	1	0	0
78	Point	Pond with information board	FA2	0	0	1	1	1
79	Point	Schneckenhaeule	FA2	0	0	1	0	0
80	Point	Schneckenhaeule	FA2	0	0	1	0	0
81	Point	Horse stable	FA2	1	0	0	1	0
82	Point	Schneckenhaeule	FA2	0	0	1	0	0
83	Point	Schneckenhaeule	FA2	0	0	1	0	0
84	Point	Schneckenhaeule	FA2	0	0	1	0	0
85	Point	Pond	FA2	0	0	1	0	1
86	Point	Schneckenhaeule	FA2	0	0	1	0	0
87	Point	Pond	FA2	0	0	1	0	1
88	Point	Schneckenhaeule	FA2	0	0	1	0	0
89	Point	Schneckenhaeule	FA2	0	0	1	0	0
90	Point	Pond	FA2	0	0	1	0	1
91	Point	Schneckenhaeule	FA2	0	0	1	0	0
92	Point	Schneckenhaeule	FA2	0	0	1	0	0
93	Point	Pond	FA2	0	0	1	0	1
94	Point	Pond	FA2	0	0	1	0	1
95	Point	Schneckenhaeule	FA2	0	0	1	0	0
96	Area	Own garden plot	AV1	1	0	0	1	0
97	Area	Pastures	AV1	0	0	0	1	0
98	Area	Own garden plot	AV1	1	0	0	1	0
99	Area	Appealing landscape	AV1	0	0	1	0	1
100	Area	Orchards	AV1	1	1	0	0	0
101	Area	View	AV1	0	0	1	0	0
102	Area	Hill	AV1	0	0	1	0	1
103	Area	Orchards	AV1	1	1	0	0	0
104	Area	Cow pasture	AV1	1	0	1	0	0
105	Area	Cow pasture	AV1	1	0	1	0	0
106	Area	Cow pasture	AV1	1	0	1	0	0
107	Line	Favorite path	AV1	0	0	0	1	0
108	Line	Favorite path	AV1	0	0	0	1	0
109	Line	Favorite path	AV1	0	0	0	1	0
110	Line	Favorite path	AV1	0	0	0	1	0
111	Line	Jogging route	AV1	0	0	0	1	0
112	Line	Favorite path	AV1	0	0	0	1	0
113	Line	Favorite path	AV1	0	0	0	1	0
114	Line	Favorite path	AV1	0	0	0	1	0
115	Line	Favorite path	AV1	0	0	0	1	0
116	Line	Favorite path	AV1	0	0	0	1	0
117	Line	Favorite jogging route (partly open landscape)	AV1	0	0	0	1	0
118	Line	Jogging route	AV1	0	0	0	1	0
119	Line	Nice path due to surrounding fields	AV1	0	0	0	1	0
120	Line	Favorite path, view	AV1	0	0	0	1	0
121	Point	CVJM club house	AV1	1	0	0	1	0
122	Point	Farm	AV1	1	0	0	0	0
123	Point	Pond with viewpoint	AV1	0	0	1	0	1
124	Point	Garden plot	AV1	1	0	0	1	0
125	Point	NABU pond	AV1	0	0	1	0	1
126	Area	Flower-rich meadows, forest edge	AV2	0	1	1	0	1
127	Area	Diversity	AV2	0	0	1	0	1
128	Area	Forest edge	AV2	0	0	1	0	1
129	Area	Forest edge	AV2	0	0	1	0	1
130	Area	Garden plot	AV2	1	0	0	1	0
131	Area	Primroses	AV2	0	0	1	0	1
132	Area	Diversity	AV2	0	0	1	0	1
133	Area	Orchard of a friend	AV2	1	0	0	1	0
134	Area	Own orchard	AV2	1	0	0	1	0
135	Area	Own orchard	AV2	1	0	0	1	0
136	Line	View	AV2	0	0	1	0	0
137	Line	Favorite path	AV2	0	0	0	1	0
138	Line	Usual dog walk route	AV2	0	0	0	1	0
139	Line	Usual dog walk route	AV2	0	0	0	1	0
140	Line	Favorite path	AV2	0	0	0	1	0
141	Line	Favorite path	AV2	0	0	0	1	0
142	Line	Favorite path	AV2	0	0	0	1	0
143	Line	Favorite path	AV2	0	0	0	1	0
144	Line	Favorite path	AV2	0	0	0	1	0
145	Line	Favorite path	AV2	0	0	0	1	0
146	Line	Favorite path	AV2	0	0	0	1	0
147	Line	Jogging route	AV2	0	0	0	1	0
148	Line	Jogging route, view	AV2	0	0	0	1	0
149	Line	View, landscape diversity	AV2	0	0	1	0	1
150	Line	Maienwasen-route	AV2	0	0	0	1	0
151	Point	Feuerboelle	AV2	0	0	1	0	1
152	Point	Feuerboelle	AV2	0	0	1	0	1
153	Point	Forest edge	AV2	0	0	1	0	1
154	Point	Feuerboelle	AV2	0	0	1	0	1
155	Point	Feuerboelle	AV2	0	0	1	0	1
156	Point	Feuerboelle	AV2	0	0	1	0	1
157	Point	Feuerboelle	AV2	0	0	1	0	1
158	Point	Feuerboelle	AV2	0	0	1	0	1
159	Point	View	AV2	0	0	1	0	0
160	Point	Feuerboelle	AV2	0	0	1	0	1
161	Point	Bench	AV2	0	0	1	1	0
162	Point	View	AV2	0	0	1	0	0
163	Point	Orchard	AV2	1	0	0	1	0
164	Point	Orchard	AV2	1	0	0	1	0
165	Point	Feuerboelle	AV2	0	0	1	0	1
166	Point	Feuerboelle	AV2	0	0	1	0	1
167	Point	View	AV2	0	0	1	0	0
168	Point	Feuerboelle	AV2	0	0	1	0	1
169	Area	Randecker Maar	KA2	0	0	1	0	1
170	Area	Nice photo scene	KA2	0	0	1	0	1
171	Area	Nice photo scene	KA2	0	0	1	0	1
172	Area	Randecker Maar	KA2	0	0	1	0	1
173	Area	Randecker Maar	KA2	0	0	1	0	1
174	Area	Randecker Maar	KA2	0	0	1	0	1
175	Area	Randecker Maar	KA2	0	0	1	0	1
176	Area	Randecker Maar	KA2	0	0	1	0	1
177	Area	Randecker Maar	KA2	0	0	1	0	1
178	Area	Fields	KA2	0	0	1	0	0
179	Area	Fields	KA2	0	0	1	0	0
180	Area	Fields	KA2	0	0	1	0	0
181	Area	Fields	KA2	0	0	1	0	0
182	Area	Fields	KA2	0	0	1	0	0
183	Area	Randecker Maar	KA2	0	0	1	0	1
184	Area	Randecker Maar	KA2	0	0	1	0	1
185	Area	Naturalness	KA2	0	0	1	0	1
186	Area	Naturalness	KA2	0	0	1	0	1
187	Area	Appealing landscape	KA2	0	0	1	0	1
188	Area	Randecker Maar	KA2	0	0	1	0	1
189	Line	Favorite path, view	KA2	0	0	0	1	0
190	Line	Favorite path	KA2	0	0	0	1	0
191	Line	Favorite path	KA2	0	0	0	1	0
192	Line	Favorite hiking path	KA2	0	0	0	1	0
193	Line	Favorite path due to view and surrounding nature	KA2	0	0	0	1	0
194	Line	Favorite path	KA2	0	0	0	1	0
195	Line	Zipfelbach	KA2	0	0	1	0	1
196	Line	Zipfelbach	KA2	0	0	1	0	1
197	Line	Favorite path	KA2	0	0	0	1	0
198	Line	Hiking trail	KA2	0	0	0	1	0
199	Line	Hiking trail	KA2	0	0	0	1	0
200	Point	Memorial stone	KA2	0	1	0	0	0
201	Point	Cows	KA2	0	0	1	0	0
202	Point	Memorial stone	KA2	0	1	0	0	0
203	Point	View	KA2	0	0	1	0	0
204	Point	Barbecue area	KA2	0	0	0	1	0
205	Point	Barbecue area	KA2	0	0	0	1	0
206	Point	Ziegelhuette	KA2	0	0	0	1	0
207	Point	View	KA2	0	0	1	0	0
208	Point	Ornithological station	KA2	0	1	0	0	0
209	Point	Ziegelhuette	KA2	0	0	0	1	0
210	Point	View	KA2	0	0	1	0	0
211	Point	View	KA2	0	0	1	0	0
212	Point	Ziegelhuette	KA2	0	0	0	1	0
213	Point	Ziegelhuette	KA2	0	0	0	1	0
				Cultural Ecosystem Services
				Identity	Heritage	Aesthetics	Recreation	Natural Features
			All	21	13	125	80	82
			Glems	10	2	8	19	4
			Owen	6	1	24	20	19
			Donnstetten	2	3	15	5	9
			Schopfloch	0	3	27	15	17
			Ehestetten	0	2	18	3	12
			Frankenhofen	3	2	33	18	21
